# Supplementary material for: Bismuth functionalized PVA film: field, plasmonic and pH effect on PVA originated broad photoluminescence
Source: Royal Society of Chemistry journal article supplement (doi:10.1039/c5ra27441a), 2016-01-01

**Supplementary Fig.1.** FTIR of Bi NPs in PVA at different pH values i.e. Water (H), water +NaOH (HN), and water +HCL (HC).

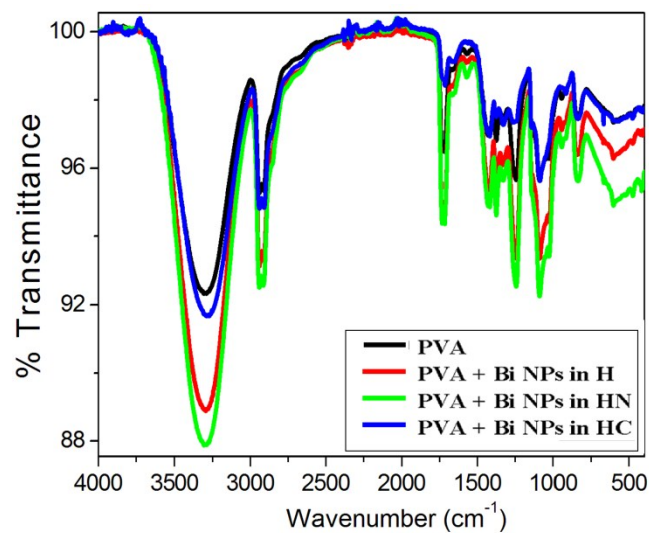

Supplement: c5ra27441a1.pdf [file c5ra27441a1.pdf]
